# Supplementary material for: Chemical bridging in a 2D/3D heterojunction via dual-anchoring functionalized molecules for efficient, stable and flexible perovskite solar cells
Source: Royal Society of Chemistry journal article supplement (doi:10.1039/d5ee03302k), 2026-01-01
Supplement: d5ee03302k1.pdf [file d5ee03302k1.pdf]

# Electronic Supplementary Information

## Chemical Bridging in 2D/3D Heterojunction via Dual-Anchoring Functionalized Molecules for Efficient, Stable and Flexible Perovskite Solar Cells

Lei Zhao<sup>a</sup>, Jie Zhang<sup>a</sup>, Yikun Hua<sup>a</sup>, Xinyue Song<sup>a</sup>, Chao Wu<sup>a</sup>, Ruiqian Chen<sup>a</sup>, Yang Feng<sup>a</sup>, Haoran Deng<sup>a</sup>, Jiacheng Su<sup>a</sup>, Lei Gu<sup>a</sup>, Wei Hui<sup>a</sup>, Weiyuan Chen<sup>a</sup>, Chunming Yang<sup>b</sup>, Lin Song<sup>\*a</sup>

---

*State Key Laboratory of Flexible Electronics (LOFE)&Institute of Flexible Electronics (IFE), Northwestern Polytechnical University, 127 West Youyi Road, Xi'an 710072, P.R. China*

*Shanghai Synchrotron Radiation Facility (SSRF), Zhangjiang Laboratory, Shanghai Advanced Research Institute, Chinese Academy of Sciences, 239 Zhangheng Road, Shanghai 201204, P. R. China*

†L. Zhao and J. Zhang contributed equally to this work

### Contents

1. Experimental Section
2. Supporting Figures
3. Supporting Tables
4. References

## 1. Experimental Section

**Materials and Precursor Preparation:** Lead iodide ( $\text{PbI}_2$ , 99.9%, Xi'an Polymer Light Technology Corp), formamidinium iodide (FAI, >99.99%, Great Cell), methylammonium chloride (MACl, >99.99%, Great Cell), cesium iodide (CsI, 99.0%, TCI), methylammonium lead tribromide ( $\text{MAPbBr}_3$ , 99%, Xi'an Yuri Solar Co., Ltd.), Spiro-OMeTAD (99.5%, Xi'an Yuri Solar Co., Ltd.), ethyl acetate (EA, 99.8%, Adamas), 2-pentanol (IPA, 98%, Adamas), acetonitrile (ACN, 99.9%, Sigma Aldrich), N,N-dimethylformamide (DMF,  $\geq 99.8\%$ , Sigma-Aldrich), dimethyl sulfoxide (DMSO,  $\geq 99.9\%$ , Sigma-Aldrich), chlorobenzene (CB, 99%, Sigma-Aldrich), 4-tert-butylpyridine (TBP, 98%, Sigma-Aldrich), 5-Methyltryptamine hydrochloride (Me-TACl, 99.5%, Macklin).

**Preparation of perovskite, Spiro-OMeTAD and modification solutions:** The perovskite studied in this work was  $(\text{Cs}_{0.03}\text{FA}_{0.97}\text{PbI}_3)_{0.975}(\text{MAPbBr}_3)_{0.025}$ . FAI (233 mg), MACl (33 mg), CsI (11 mg),  $\text{PbI}_2$  (705 mg),  $\text{MAPbBr}_3$  (18 mg) were dissolved in a mixed solvent of DMF and DMSO (8:1 v/v) to achieve the triple-cation perovskite solution. For hole transport material (HTM) solution, 72.3 mg Spiro-OMeTAD was dissolved in 1 mL CB with additives of 17.6  $\mu\text{L}$  LiTFSI solution (520 mg  $\text{mL}^{-1}$  in ACN) and 28.8  $\mu\text{L}$  TBP. For the post treatment, 5 mg Me-TACl was dissolved in 1 mL IPA.

**Preparation of  $\text{SnO}_2$  layer:** For rigid PSCs, the chemical bath deposition (CBD) is employed. In detail, the solution was prepared by mixing urea (2.55 g), HCl (2.5 mL), thioglycolic acid (TGA) (110  $\mu\text{L}$ ), and  $\text{SnCl}_2 \cdot 2\text{H}_2\text{O}$  (0.555 g) in DI water (400 mL). Urea was gradually dissolved under continuous stirring. Subsequently, HCl was introduced to stabilize the solution. Afterward, TGA and  $\text{SnCl}_2 \cdot 2\text{H}_2\text{O}$  was added in sequence under vigorous stirring. The resulting solution was stirred for an additional 30 min. Fluorine-doped tin oxide (FTO) substrates were immersed into the precursor solution, ensuring full submersion without air bubble adhesion. The reaction vessel with the FTO substrates inside was then heated to 125  $^\circ\text{C}$  and stored for 2.5 h. Afterward, the substrates were sequentially rinsed with ultrapure water and isopropanol, prior to annealing at 170  $^\circ\text{C}$  for 60 min. For flexible PSCs, the  $\text{SnO}_2$  solution was spin-coated onto PEN/ITO substrates at 3000 rpm for 30 s, followed by annealing at 100  $^\circ\text{C}$  for 1 h.

**Device Fabrication:** The perovskite solution was spin-coated onto the FTO/ $\text{SnO}_2$  substrates (both glass and PEN supports) at 1000 rpm for 10 s and then 3000 rpm for 30 s. For anti-solvent treatment, 150  $\mu\text{L}$  EA was dripped onto perovskite films before the end of the second spin coating step. Afterward, the prepared perovskite films were annealed at 100  $^\circ\text{C}$  for 40 min. After this step, the Me-TACl solution was spin coated onto the as-prepared perovskite film (5000rpm for 30 s) and then anneal at 85  $^\circ\text{C}$  for 1 min, followed by a spin coating of Spiro-OMeTAD solution (3000 rpm, 30 s). Finally, 18-nm-thick  $\text{MoO}_3$  and 130-nm-thick Ag electrodes were thermally evaporated under vacuum in sequence to complete the PSC fabrication.

### Characterizations and Measurements:

The  $J$ - $V$  sweeps of the photovoltaic devices were obtained using a Keithley 2400 Source Meter under simulated AM 1.5 G illumination (100  $\text{mW cm}^{-2}$ ) with a solar simulator (EnliTech SS-F5-3A), and the light intensity was calibrated using a reference silicon solar cell, calibrating to 1 sun. The measurements were carried out in a  $\text{N}_2$  glove box (<0.1 ppm  $\text{O}_2$  and  $\text{H}_2\text{O}$ , temperature: 25  $^\circ\text{C}$ ). The devices were measured both in forward scan (1.2 V  $\rightarrow$  -0.2 V, step 0.02

V, delay 20 ms) and reverse scan ( $-0.2\text{ V} \rightarrow 1.2\text{ V}$ , step  $0.02\text{ V}$ , delay 20 ms). The EQE spectra were measured using a QTEST HIFINITY 5 (Crowntech Inc., USA) at room temperature in air. The light intensity was calibrated using a standard single-crystal Si photovoltaic cell. SEM measurements were carried out on a Hitachi S-4800 electron microscope. UV-vis absorption spectra were measured with a UV/Vis spectrophotometer (U-3900H, Hitachi High-tech Co., Ltd). TRPL and PL measurements were carried out on FLS1000. XPS and UPS measurements were carried out with a Kratos Axis Supra photoelectron spectrometer equipped with a monochromatic source of Al (K $\alpha$ ) ( $1486.6\text{ eV}$ ) X-rays. GIWAXS measurements were performed at beamline BL16B1 of SSRF. The X-ray energy was  $10\text{ keV}$  (wavelength  $\lambda=1.24\text{ \AA}$ ). Synchrotron X-ray continuously exposes on substrate with a  $0.4^\circ$  incident angle with  $5\text{ s}$  detector exposure time. The detector pixel size is  $0.172\text{ mm} \times 0.172\text{ mm}$ .

2. Supporting Figures

Chemical structure of Me-TACl.

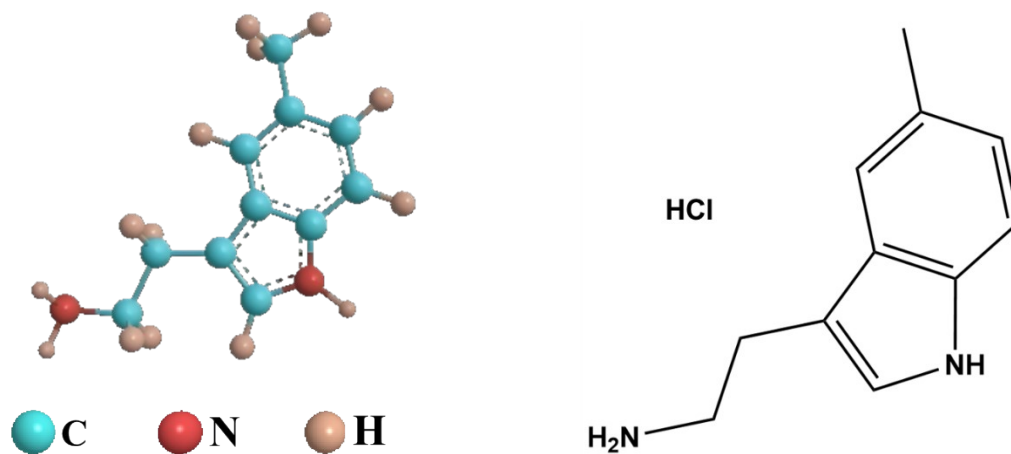

Figure S1. Chemical structure of Me-TACl.

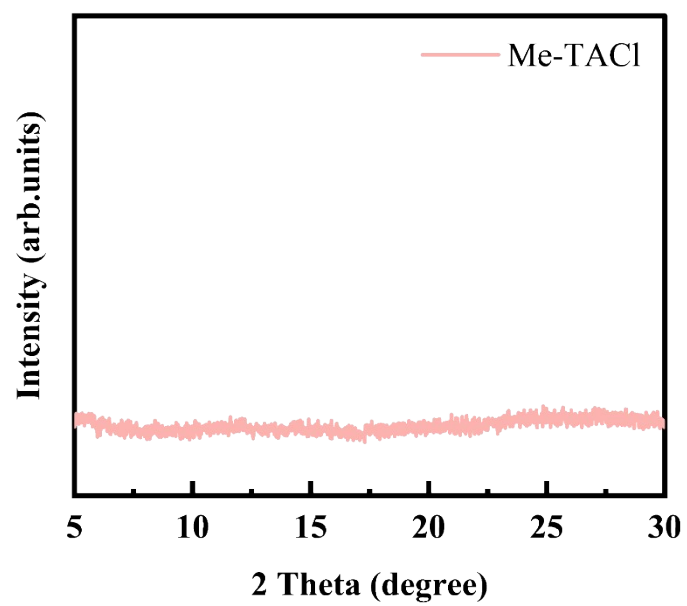

Figure S2. XRD pattern of the pure Me-TACl.

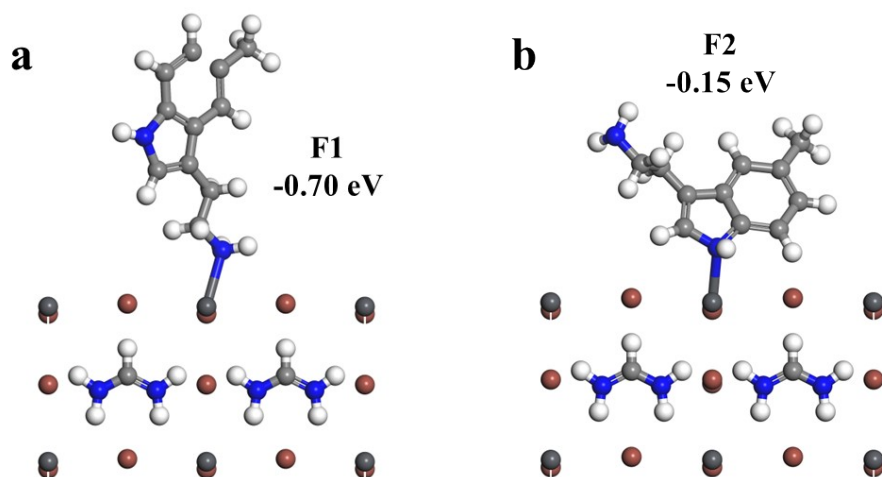

Figure S3. Binding energy between Me-TA<sup>+</sup> and [PbI<sub>6</sub>]<sup>4-</sup> for (a) F1 and (b) F2 type.

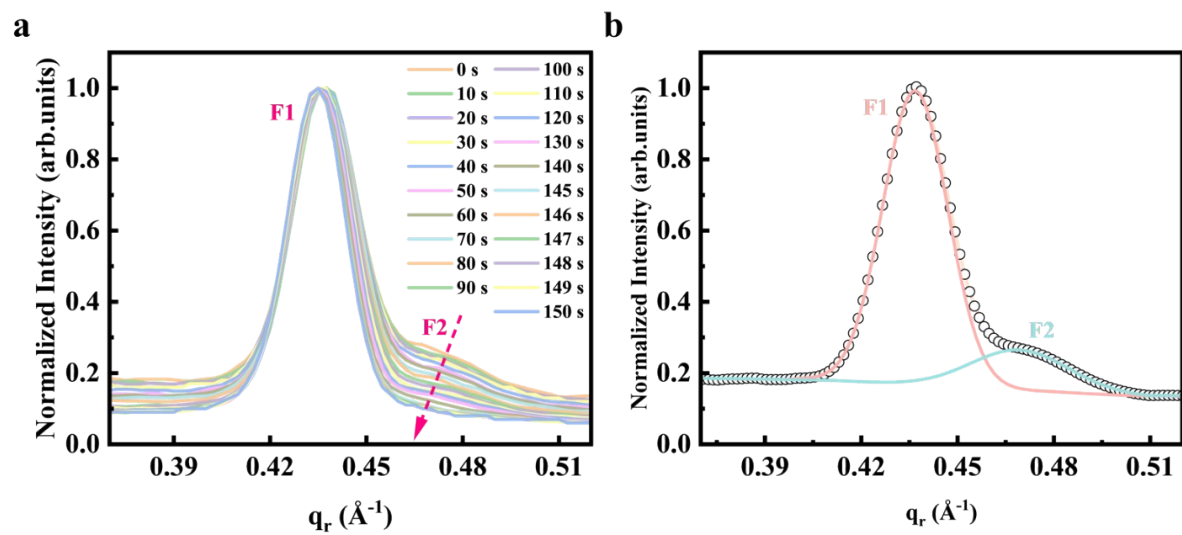

Figure S4. In-situ GIWAXS data of the 2D perovskites.

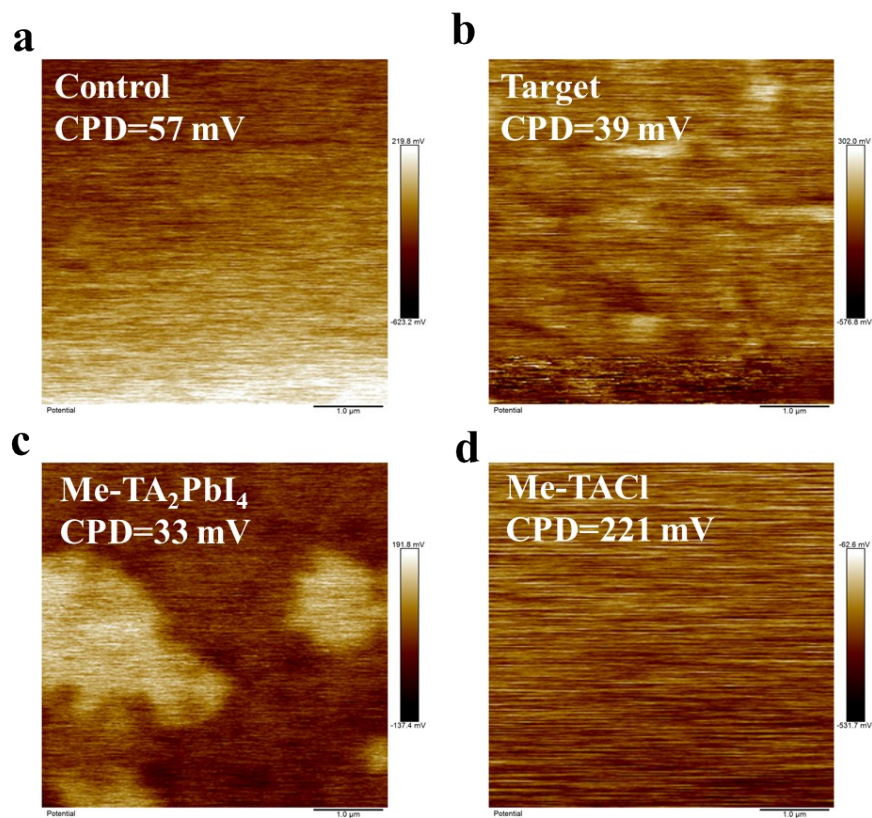

Figure S5. KPFM of (a) the control, (b) target, (c) Me-TA<sub>2</sub>PbI<sub>4</sub> (n=1 phase) and (d) pure Me-TACl films.



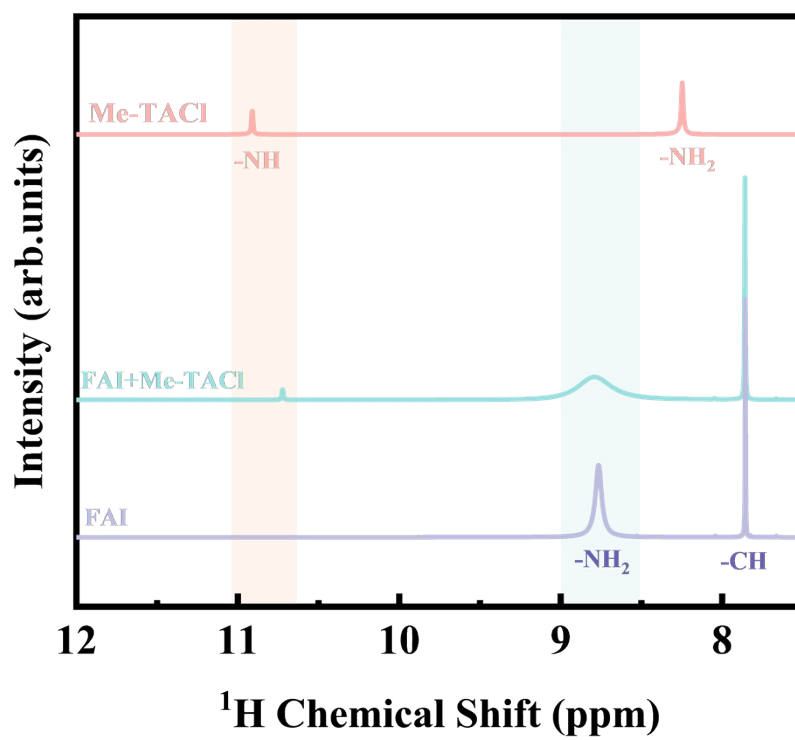

Figure S6.  $^1\text{H}$ -NMR spectra of Me-TACl, FAI and Me-TACl/FAI dissolved in DMSO- $\text{D}_6$  solution.

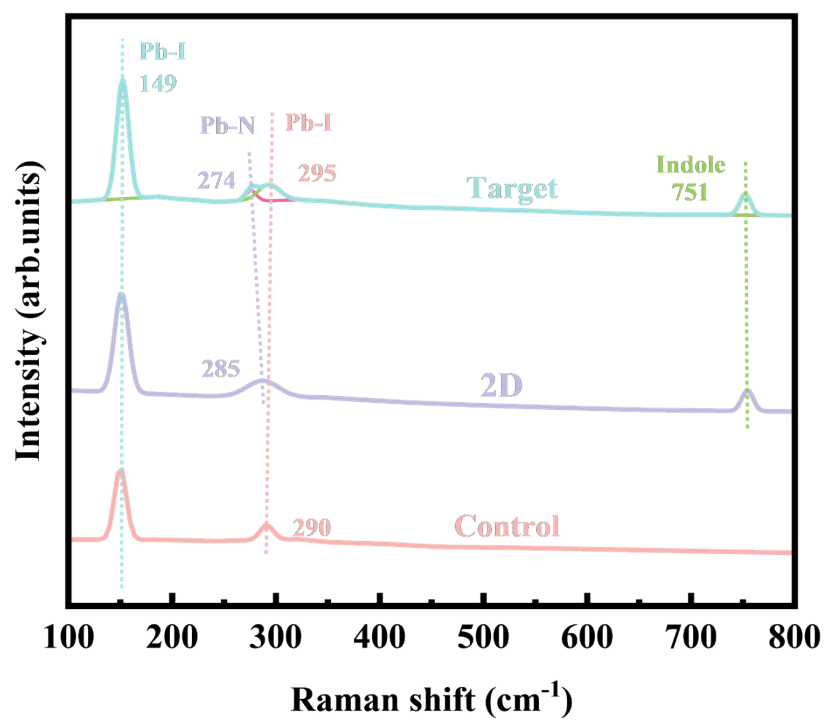

Figure S7. Raman spectra of pure 2D, pure 3D and 2D/3D perovskites.

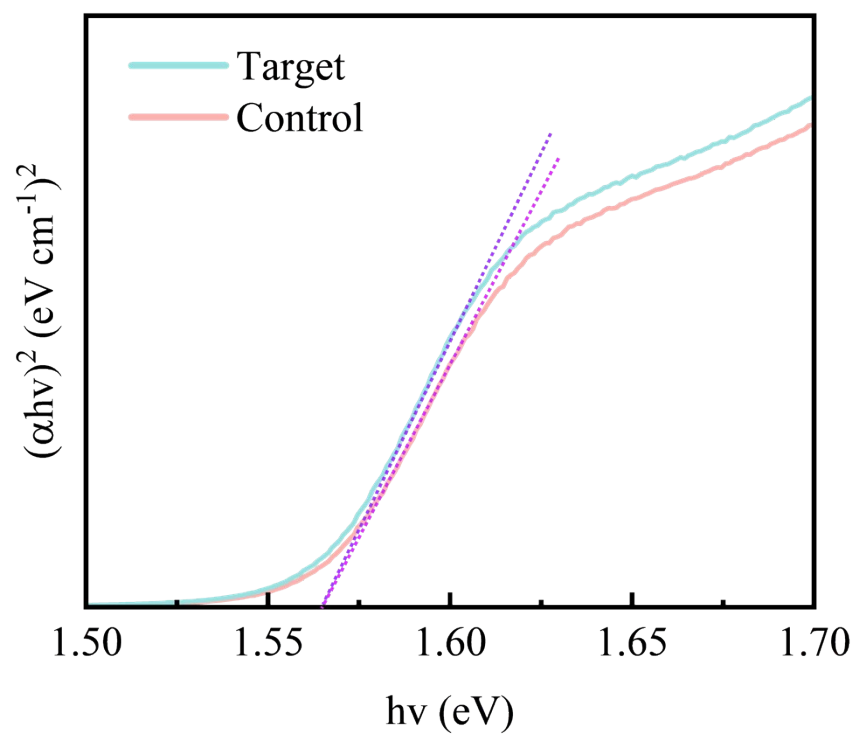

Figure S8. Tauc plots of the control and target films.

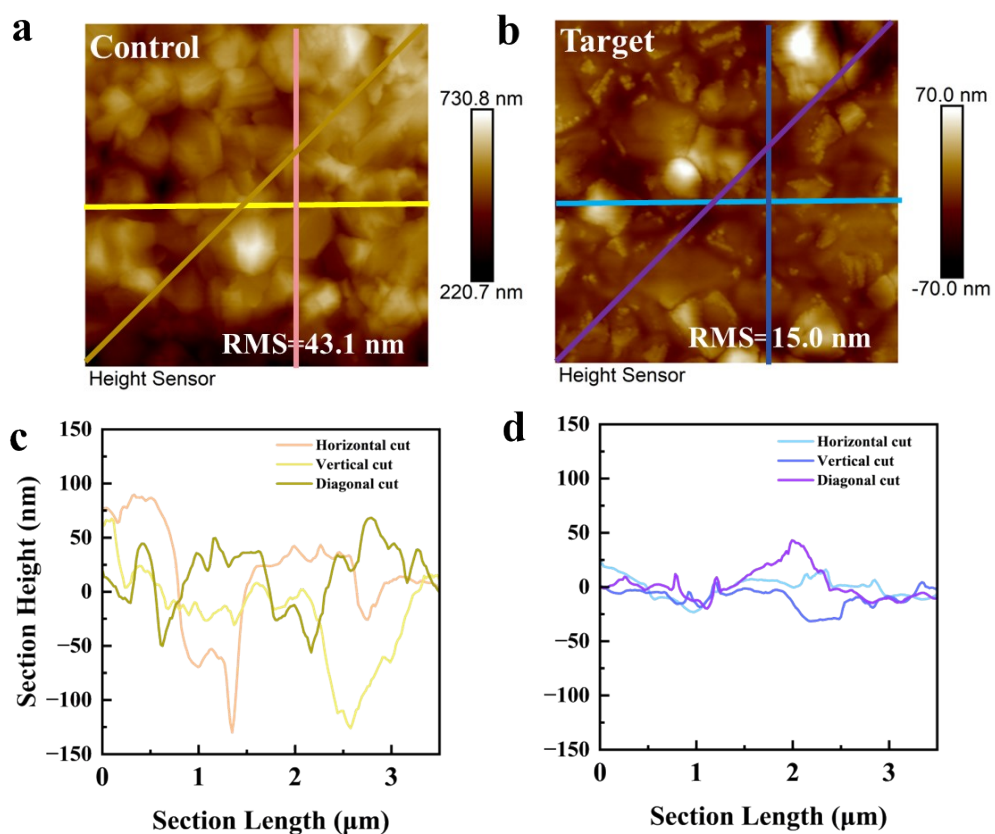

Figure S9. Mean square roughness (RMS) analysis of (a) control and (b) target films. The height profiles of the (c) control film and the (d) target film.

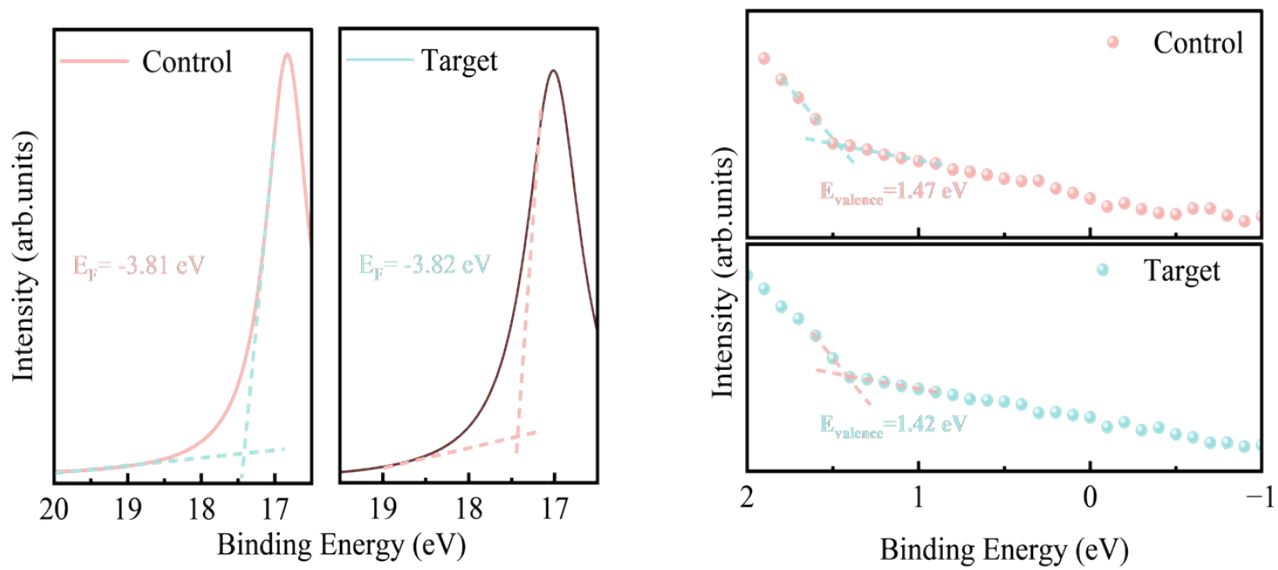

Figure S10. Secondary electron cutoff region and onset region of UPS spectra for the control and target films.

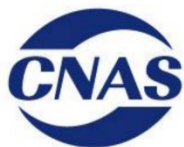

中国认可  
检测  
TESTING  
CNAS L2338

# TEST REPORT

Report No: PWQC-WT-P24013021-5R

**Sample Name :** Photovoltaic cell  
**Client :** Prof. Song Lin's Group, Northwestern  
Polytechnical University  
**Client Address :** No. 127 West Youyi Road, Xi'an, P. R.  
China  
**Type of Project :** Consignation

PHOTOVOLTAIC AND WIND POWER SYSTEMS QUALITY TEST CENTER, IEE,  
CHINESE ACADEMY OF SCIENCES

October, 24, 2024

PHOTOVOLTAIC AND WIND POWER SYSTEMS QUALITY TEST CENTER, IEE,  
CHINESE ACADEMY OF SCIENCES

Report No: PWQC-WT-P24013021-5R

**Testing information:**

Date: January, 31, 2024  
Location: No.6 Bei-er-tiao, Zhongguancun, Haidian district, Beijing, China  
Environmental conditions:  $(24.9\pm2)^{\circ}\text{C}$ ,  $(31.8\pm5)\%\text{RH}$

**Testing items:**

Measurement of photovoltaic current-voltage characteristics

**Standards:**

IEC 60904-1: 2006 Photovoltaic (PV) devices  
— Part 1: Measurement of photovoltaic current-voltage characteristics

**Equipments:**

| Name            | S/N      | Expired date |
|-----------------|----------|--------------|
| Solar simulator | LE106-04 | 2024-10-15   |
| Source Meter    | LE177-01 | 2024-04-09   |
| Reference cell  | J-CH04   | 2024-02-15   |

Edited

by(signatory): Jiang Feifei  
Date: 2024.10.24

Approved

by(signatory):  *Li Maifan*  
Date: 2024.10.24

PHOTOVOLTAIC AND WIND POWER SYSTEMS QUALITY TEST CENTER, IEE,  
CHINESE ACADEMY OF SCIENCES

Report No: PWQC-WT-P24013021-5R

|                 |                                                                                                                                         |
|-----------------|-----------------------------------------------------------------------------------------------------------------------------------------|
| Sample No.      | DC2024a144                                                                                                                              |
| Sample S/N      | 5                                                                                                                                       |
| Type            | Single junction perovskite solar cell                                                                                                   |
| Designated area | 0.08713 cm <sup>2</sup><br>The designated area was certified by National Institute of Metrology, China. Test Report No. CDjc2021-10891. |

电力系统

专用

|                                                                                                                                     |                                                             |                               |            |                        |                                  |
|-------------------------------------------------------------------------------------------------------------------------------------|-------------------------------------------------------------|-------------------------------|------------|------------------------|----------------------------------|
| Items of testing                                                                                                                    | Measurement of photovoltaic current-voltage characteristics |                               |            |                        |                                  |
| Sample No.                                                                                                                          | DC2024a144                                                  |                               |            |                        |                                  |
| Results                                                                                                                             | Isc<br>(mA)                                                 | Jsc<br>(mA/ cm <sup>2</sup> ) | Voc<br>(V) | Pm<br>(mW)             | Curve<br><br>A2024013116<br>0248 |
|                                                                                                                                     | 2.296                                                       | 26.356                        | 1.177      | 2.240                  |                                  |
|                                                                                                                                     | lpm<br>(mA)                                                 | Vpm<br>(V)                    | FF<br>(%)  | E <sub>ff</sub><br>(%) |                                  |
|                                                                                                                                     | 2.175                                                       | 1.030                         | 82.89      | 25.71                  |                                  |
| Measurement uncertainty:<br>U <sub>95(Isc)</sub> =1.9% (k=2)<br>U <sub>95(Voc)</sub> =1.8% (k=2)<br>U <sub>95(Pm)</sub> =2.5% (k=2) |                                                             |                               |            |                        |                                  |



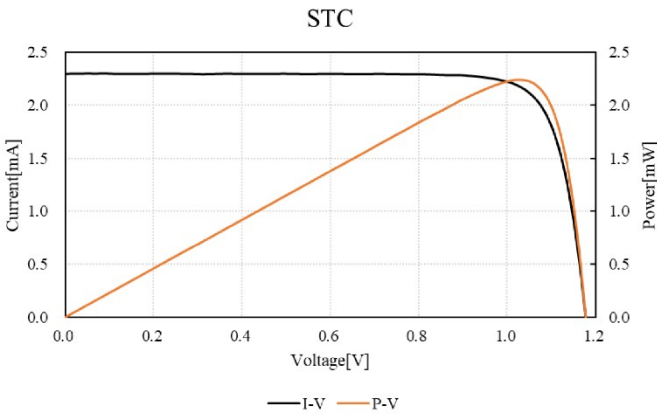

|                 |                                       |
|-----------------|---------------------------------------|
| Type            | Single junction perovskite solar cell |
| Sample No.      | DC2024a144                            |
| Area            | 0.08713 cm <sup>2</sup>               |
| Isc             | 2.296 mA                              |
| Jsc             | 26.356 mA/cm <sup>2</sup>             |
| Voc             | 1.177 V                               |
| FF              | 82.89 %                               |
| Pm              | 2.240 mW                              |
| E <sub>ff</sub> | 25.71 %                               |
| I <sub>pm</sub> | 2.175 mA                              |
| V <sub>pm</sub> | 1.030 V                               |
| Voltage Sweep   | Reverse                               |
| Sweep time      | 25.1 s                                |
| Temp            | 25 °C                                 |
| Irr             | 100 mW/cm <sup>2</sup>                |
| Curve           | A20240131160248                       |

— End of Report —

## NOTICE

1. The test result in this report relate only to the sample tested.
2. This report is not available without seal of Photovoltaic and Wind Power Systems Quality Test Center, IEE, Chinese Academy of Sciences (PWQTC). Additionally, Appendix pages are not available without seal of PWQTC.
3. The content of this report may not be changed. The report shall not be as any specific commercial advertisement without written permission of the PWQTC.
4. Any copy of this report is not available without seal of PWQTC.
5. This report may not be reproduced in any form or by any means, without permission in writing from the PWQTC.
6. Client could contact us for any questions within 15 days since the date when you received this report.

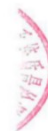

Address: No.6 Bei-er-tiao, Zhongguancun, Haidian district, Beijing, China

Post code: 100190

Fax: +86-10-82547052-607

Tel: +86-10-82547051

E-mail: pvcenter@mail.iee.ac.cn

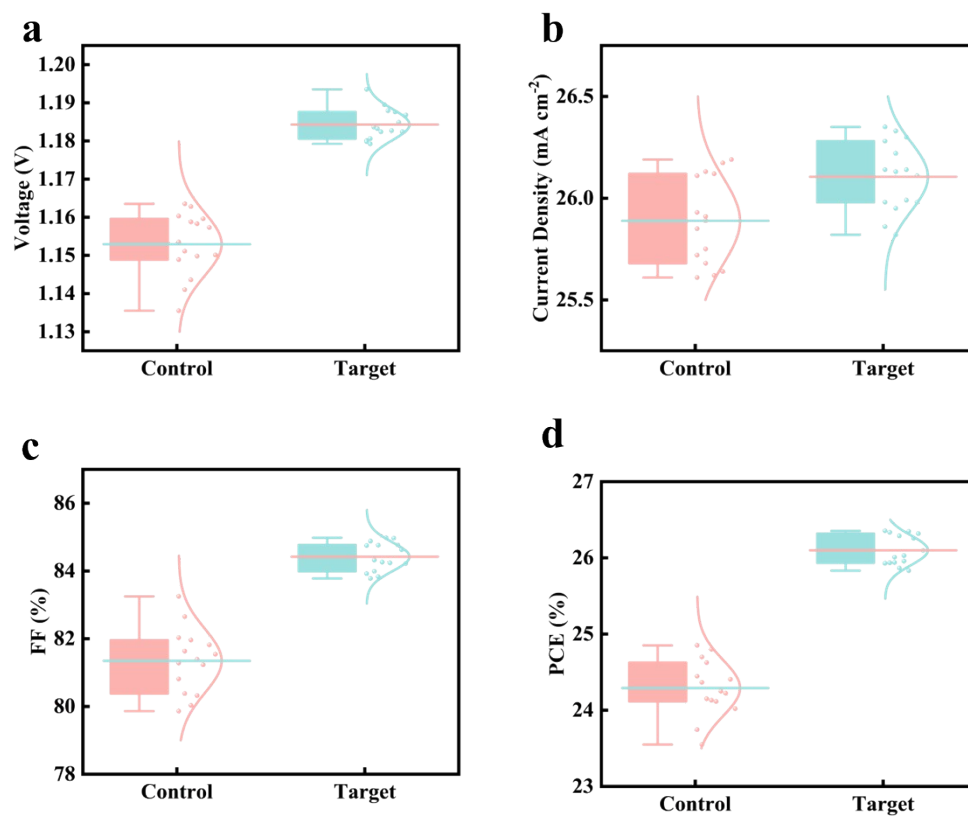

Figure S12. Rigid device photovoltaic parameters of control and target devices. Box plots showing the distribution of the (a)  $V_{oc}$ , (b)  $J_{sc}$ , (c) FF and (d) PCE of the rigid devices.

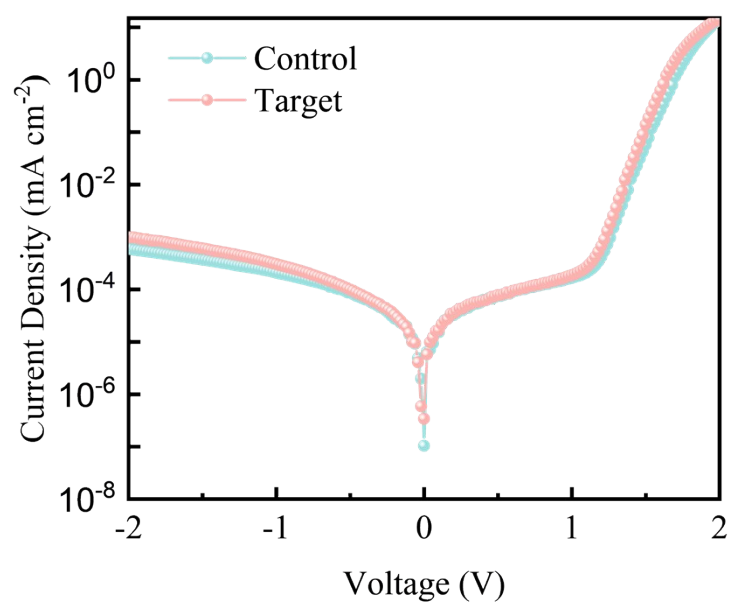

Figure S13. *J-V* curves under the dark condition.

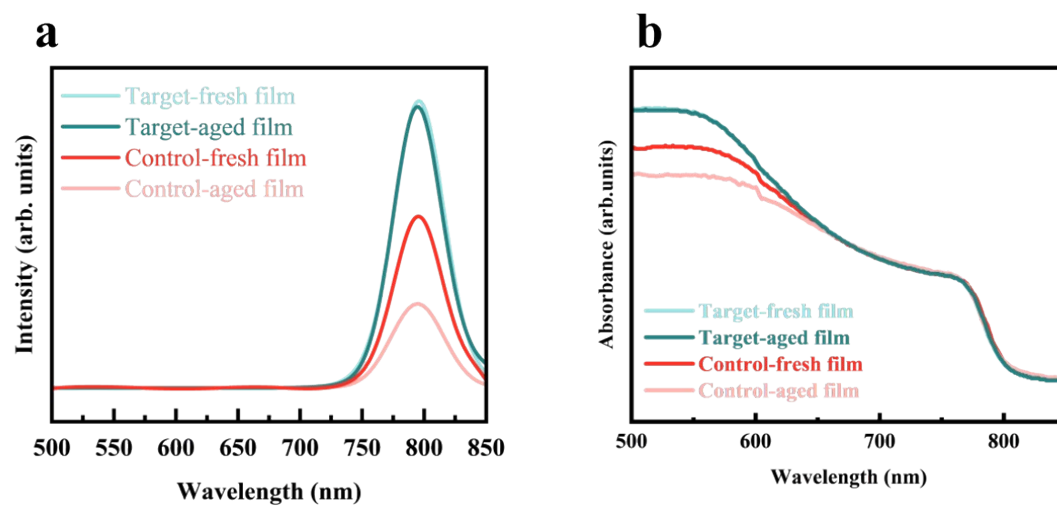

**Figure S14.** (a) PL and (b) UV-vis curves of the control and target films stored in air (60% RH) for 30 d.

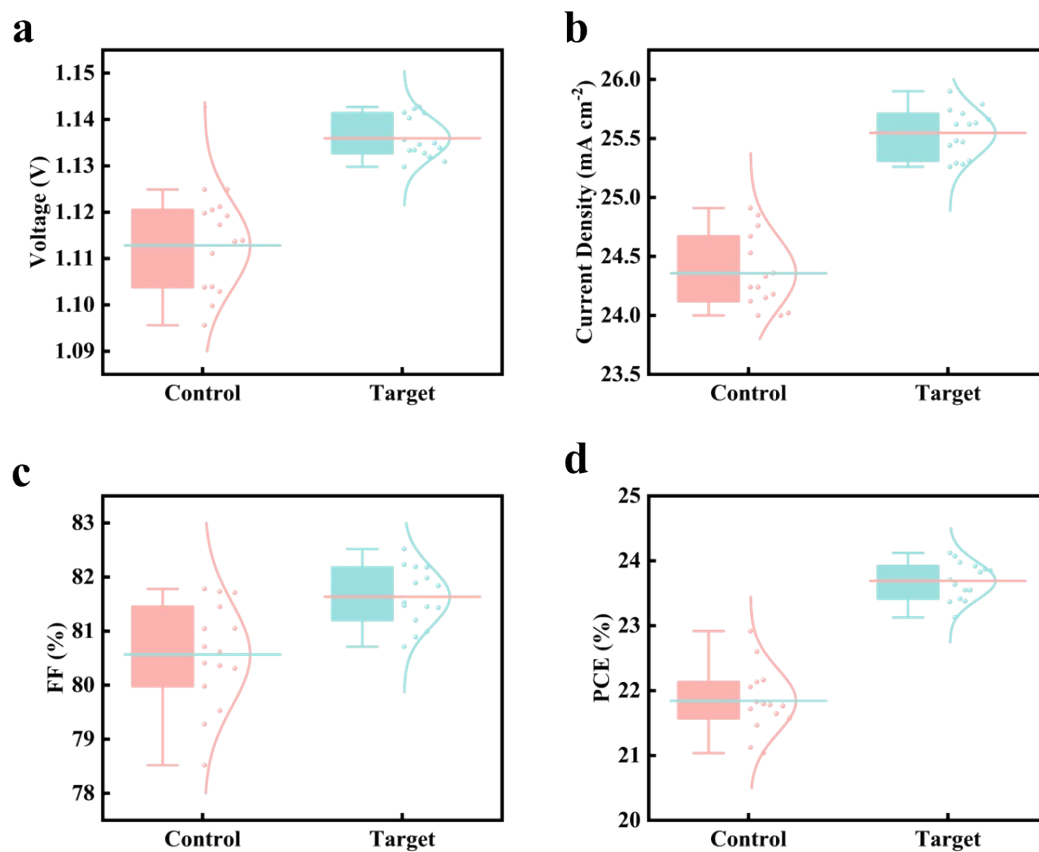

Figure S15. Flexible device photovoltaic parameters of control and target devices. Box plots showing the distribution of the (a)  $V_{oc}$ . (b)  $J_{sc}$ . (c) FF and (d) PCE of the flexible devices.

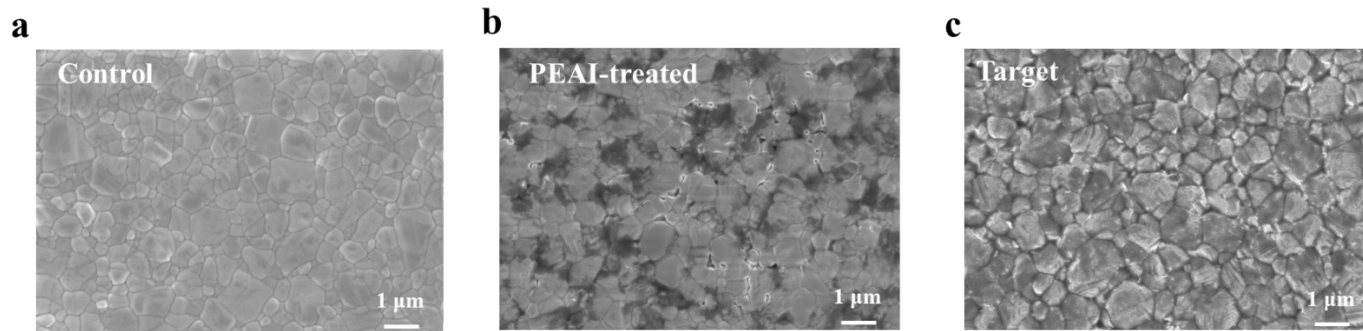

Figure S16. Plan-view SEM images of (a) the control, (b)PEAI-treated and (c) target samples before bending.

### 3. Supporting Tables

Table S1. TRPL fitting results.

| Sample  | $A_1$ (%) | $\tau_1$ (ns) | $A_2$ (%) | $\tau_2$ (ns) | $\tau_{ave}$ (ns) |
|---------|-----------|---------------|-----------|---------------|-------------------|
| Control | 0.66      | 20.61         | 0.34      | 180.51        | 151.94            |
| Target  | 0.63      | 1.87          | 0.37      | 32.46         | 29.71             |



| Device type            | Sample  | $V_{oc}$ (V) | $J_{sc}$ (mA cm <sup>-2</sup> ) | FF (%)       | PCE (%)      |
|------------------------|---------|--------------|---------------------------------|--------------|--------------|
| Rigid <sup>a)</sup>    | Control | 1.15±0.0089  | 25.96±0.2437                    | 81.36±0.9644 | 24.33±0.3788 |
|                        | Target  | 1.18±0.0048  | 26.12±0.1768                    | 84.43±0.3550 | 26.11±0.1807 |
| Flexible <sup>b)</sup> | Control | 1.11±0.0104  | 24.36±0.3192                    | 81.17±1.2883 | 21.90±0.6002 |
|                        | Target  | 1.14±0.0062  | 25.54±0.3415                    | 81.77±0.8998 | 23.75±0.5212 |

Table S2. Average photovoltaic performance and standard deviation of different devices

1. All efficiency data were obtained from three independent batches (5 control devices and 5 target devices per batch), with hysteresis effects verified by stabilized power output (SPO) measurements (26.20% vs. *J-V* 26.35%). Environmental-induced errors were confirmed to be <±0.3% through controlled experiments.
2. All efficiency data were obtained from five independent batches (3 control devices and 3 target devices per batch), with hysteresis effects verified by stabilized power output (SPO) measurements (24.14% vs. *J-V* 24.21%). Environmental-induced errors were confirmed to be <±0.3% through controlled experiments.

Table S3. Comparison of the method and performance with previously reported 2D/3D heterojunction perovskite solar cells.

| Year | Molecule Name | Structure of 2D perovskite                                 | PCE                         | Ref.      |
|------|---------------|------------------------------------------------------------|-----------------------------|-----------|
| 2025 | Me-TACl       | (Me-TA) <sub>2</sub> PbI <sub>4</sub>                      | 26.35%<br>24.21% (flexible) | This work |
| 2025 | 3-F-4-ClAnI   | (3-F-4-ClAn) <sub>2</sub> FAPb <sub>2</sub> I <sub>7</sub> | 24.74 %                     | [29]      |
| 2025 | DPA-PEAI      | (DPA-PEA) <sub>2</sub> PbI <sub>4</sub>                    | 25.70 %                     | [30]      |
| 2024 | 2F-PD         | (2F-PD) <sub>2</sub> PbI <sub>4</sub>                      | 24.82 %                     | [31]      |
| 2023 | 4AP           | 4APPbI <sub>4</sub>                                        | 24.9 %<br>22.3 % (flexible) | [32]      |
