# Supplementary material for: Chemical bridging in a 2D/3D heterojunction via dual-anchoring functionalized molecules for efficient, stable and flexible perovskite solar cells
Source: Royal Society of Chemistry journal article supplement (doi:10.1039/d5ee03302k), 2026-01-01
Supplement: d5ee03302k2.zip [file EQE--Rigid-control.xls]

## Sheet: Sheet1
Wavelength/nm	EQE (%)	Currents (mA/cm2)	Integral current (mA/cm2)
300	66	0.000668468	0.000668468
305	62	0.00244264	0.00311111
310	57	0.00648807	0.00959918
315	54	0.0118253	0.0214245
320	54	0.0175715	0.038996
325	57	0.0301801	0.0691761
330	63	0.0410681	0.110244
335	68	0.0464205	0.156665
340	73	0.049379	0.206044
345	76	0.0533295	0.259373
350	78	0.0640753	0.323448
355	80	0.0701824	0.393631
360	81	0.0723453	0.465976
365	81	0.0828038	0.54878
370	81	0.0821678	0.630948
375	82	0.0811048	0.712053
380	83	0.088488	0.800541
385	84	0.0965678	0.897108
390	84	0.107972	1.00508
395	86	0.1344	1.13948
400	88	0.163676	1.30316
405	90	0.163481	1.46664
410	91	0.173247	1.63988
415	92	0.183782	1.82367
420	94	0.191079	2.01475
425	95	0.174465	2.18921
430	96	0.17765	2.36686
435	96	0.219823	2.58668
440	96	0.2409	2.82758
445	96	0.26177	3.08935
450	96	0.269929	3.35928
455	96	0.27024	3.62952
460	96	0.274321	3.90384
465	96	0.275334	4.17918
470	96	0.285983	4.46516
475	96	0.299159	4.76432
480	96	0.299113	5.06343
485	97	0.304256	5.36769
490	97	0.315088	5.68278
495	97	0.310702	5.99348
500	97	0.305531	6.29901
505	97	0.308852	6.60786
510	97	0.308677	6.91654
515	97	0.309213	7.22575
520	97	0.317003	7.54275
525	97	0.32216	7.86491
530	97	0.322672	8.18759
535	97	0.319135	8.50672
540	97	0.321107	8.82783
545	97	0.330181	9.15801
550	97	0.335361	9.49337
555	97	0.331154	9.82453
560	97	0.329427	10.154
565	97	0.331455	10.4854
570	96	0.327946	10.8134
575	96	0.333104	11.1465
580	96	0.342159	11.4886
585	96	0.330094	11.8187
590	96	0.321358	12.1401
595	96	0.336137	12.4762
600	96	0.345781	12.822
605	96	0.347846	13.1698
610	96	0.348372	13.5182
615	96	0.351851	13.8701
620	96	0.346578	14.2166
625	96	0.339492	14.5561
630	96	0.347517	14.9036
635	96	0.355366	15.259
640	96	0.359526	15.6185
645	96	0.352915	15.9715
650	96	0.342194	16.3136
655	96	0.34991	16.6636
660	96	0.359821	17.0234
665	95	0.363257	17.3866
670	95	0.36457	17.7512
675	96	0.366248	18.1175
680	96	0.366165	18.4836
685	96	0.340179	18.8238
690	96	0.32893	19.1527
695	96	0.344795	19.4975
700	96	0.35408	19.8516
705	96	0.3614	20.213
710	96	0.35528	20.5683
715	96	0.311559	20.8798
720	96	0.283022	21.1629
725	96	0.303476	21.4663
730	95	0.329261	21.7956
735	95	0.342503	22.1381
740	94	0.34751	22.4856
745	94	0.351897	22.8375
750	94	0.350749	23.1883
755	93	0.212825	23.4011
760	92	0.133802	23.5349
765	91	0.254894	23.7898
770	88	0.311272	24.1011
775	83	0.289928	24.391
780	75	0.25279	24.6438
785	63	0.202429	24.8462
790	50	0.151733	24.9979
795	37	0.10982	25.1078
800	26	0.0740789	25.1818
805	17	0.0463434	25.2282
810	10	0.0260725	25.2542
815	6	0.0145272	25.2688
820	4	0.00892523	25.2777
825	2	0.00475805	25.2825
830	1	0.00322207	25.2857
835	1	0.00168905	25.2874
840	0	0	25.2874
845	0	0	25.2874
850	0	0	25.29
