# Supplementary material for: Chemical bridging in a 2D/3D heterojunction via dual-anchoring functionalized molecules for efficient, stable and flexible perovskite solar cells
Source: Royal Society of Chemistry journal article supplement (doi:10.1039/d5ee03302k), 2026-01-01
Supplement: d5ee03302k2.zip [file EQE--Rigid-target.xls]

## Sheet: Sheet1
Wavelength/nm	EQE (%)	Currents (mA/cm2)	Integral current (mA/cm2)
300	69	0.000710818	0.000710818
305	66	0.00270602	0.00341684
310	64	0.00714365	0.0105605
315	59	0.0126554	0.0232159
320	57	0.017786	0.0410019
325	56	0.0287426	0.0697445
330	59	0.0388734	0.108618
335	65	0.0447924	0.15341
340	71	0.048691	0.202101
345	76	0.0544473	0.256549
350	81	0.0673814	0.32393
355	85	0.0754101	0.39934
360	88	0.0799742	0.479314
365	91	0.0935899	0.572904
370	92	0.0932658	0.66617
375	93	0.0919127	0.758083
380	94	0.0991003	0.857183
385	93	0.106288	0.963471
390	92	0.117489	1.08096
395	93	0.143396	1.22436
400	93	0.171929	1.39628
405	94	0.169842	1.56613
410	94	0.178925	1.74505
415	95	0.188761	1.93381
420	96	0.194052	2.12786
425	96	0.175535	2.3034
430	96	0.178742	2.48214
435	97	0.222113	2.70425
440	97	0.243409	2.94766
445	97	0.264497	3.21216
450	97	0.27274	3.4849
455	97	0.273055	3.75796
460	97	0.278618	4.03657
465	98	0.281071	4.31764
470	98	0.291941	4.60959
475	98	0.305392	4.91498
480	98	0.303779	5.21876
485	98	0.307393	5.52615
490	98	0.318337	5.84449
495	98	0.313905	6.15839
500	98	0.30868	6.46707
505	98	0.312036	6.77911
510	98	0.311859	7.09097
515	98	0.3124	7.40337
520	98	0.320271	7.72364
525	98	0.325481	8.04912
530	98	0.325999	8.37512
535	98	0.322425	8.69754
540	98	0.324418	9.02196
545	98	0.333585	9.35555
550	98	0.338818	9.69436
555	98	0.334568	10.0289
560	98	0.332823	10.3618
565	98	0.336592	10.6983
570	98	0.334778	11.0331
575	98	0.340044	11.3732
580	98	0.349287	11.7225
585	98	0.336971	12.0594
590	98	0.328053	12.3875
595	98	0.34314	12.7306
600	98	0.352985	13.0836
605	98	0.355093	13.4387
610	98	0.35563	13.7943
615	98	0.359181	14.1535
620	98	0.353798	14.5073
625	98	0.346565	14.8539
630	98	0.354757	15.2086
635	98	0.360919	15.5696
640	97	0.363271	15.9328
645	97	0.356591	16.2894
650	97	0.343976	16.6334
655	96	0.34991	16.9833
660	96	0.361727	17.345
665	96	0.367081	17.7121
670	96	0.366488	18.0786
675	96	0.366248	18.4448
680	96	0.366165	18.811
685	96	0.340179	19.1512
690	96	0.32893	19.4801
695	96	0.344795	19.8249
700	96	0.35408	20.179
705	96	0.3614	20.5404
710	96	0.35528	20.8957
715	96	0.311559	21.2072
720	96	0.283022	21.4903
725	96	0.305137	21.7954
730	96	0.332727	22.1281
735	96	0.347947	22.4761
740	96	0.353027	22.8291
745	95	0.355641	23.1847
750	95	0.354501	23.5392
755	94	0.215525	23.7548
760	94	0.135676	23.8904
765	92	0.259556	24.15
770	90	0.318555	24.4685
775	85	0.297267	24.7658
780	77	0.261952	25.0278
785	66	0.211407	25.2392
790	52	0.158714	25.3979
795	39	0.115055	25.5129
800	27	0.0775206	25.5905
805	18	0.0497796	25.6402
810	11	0.0292683	25.6695
815	7	0.0159984	25.6855
820	4	0.00892523	25.6944
825	2	0.00475805	25.6992
830	1	0.00322207	25.7024
835	1	0.00340939	25.7058
840	1	0.00172034	25.7075
845	0	0	25.7075
850	0	0	25.71
