# Supplementary material for: Chemical bridging in a 2D/3D heterojunction via dual-anchoring functionalized molecules for efficient, stable and flexible perovskite solar cells
Source: Royal Society of Chemistry journal article supplement (doi:10.1039/d5ee03302k), 2026-01-01
Supplement: d5ee03302k2.zip [file J-V--Flexible-target-reverse.xls]

## Sheet: Sheet1
[Volt (V)]	[J (mA/cm^2)]
-0.2	-25.8166
-0.17625	-25.809
-0.15255	-25.8056
-0.1288	-25.8044
-0.1051	-25.806
-0.08135	-25.7978
-0.05765	-25.819
-0.0339	-25.8082
-0.01015	-25.8056
0.01355	-25.7874
0.0373	-25.7826
0.061	-25.787
0.08475	-25.8004
0.10845	-25.797
0.1322	-25.7914
0.15595	-25.7798
0.17965	-25.7944
0.2034	-25.7886
0.2271	-25.7828
0.25085	-25.7668
0.2746	-25.7642
0.2983	-25.7704
0.32205	-25.7822
0.34575	-25.777
0.3695	-25.7742
0.3932	-25.754
0.41695	-25.7518
0.4407	-25.7544
0.4644	-25.756
0.48815	-25.7364
0.51185	-25.724
0.5356	-25.7148
0.5593	-25.7162
0.58305	-25.7184
0.6068	-25.7102
0.6305	-25.6922
0.65425	-25.6734
0.67795	-25.6748
0.7017	-25.6576
0.7254	-25.636
0.74915	-25.6204
0.7729	-25.5862
0.7966	-25.5252
0.82035	-25.483
0.84405	-25.4126
0.8678	-25.3148
0.89155	-25.1644
0.91525	-24.962
0.939	-24.6388
0.9627	-24.1912
0.98645	-23.4968
1.01015	-22.3712
1.0339	-20.9412
1.05765	-18.3706
1.08135	-14.1818
1.1051	-7.5522
1.1288	2.1584
1.15255	15.278
1.17625	31.2154
1.2	49.5562
